# Supplementary material for: Sequence of the Gonium pectorale Mating Locus Reveals a Complex and Dynamic History of Changes in Volvocine Algal Mating Haplotypes
Source: Oxford University Press journal article supplement (doi:10.1534/g3.115.026229), 2016-03-08
Supplement: 026229_figures1.pdf [file 026229_figures1.pdf]

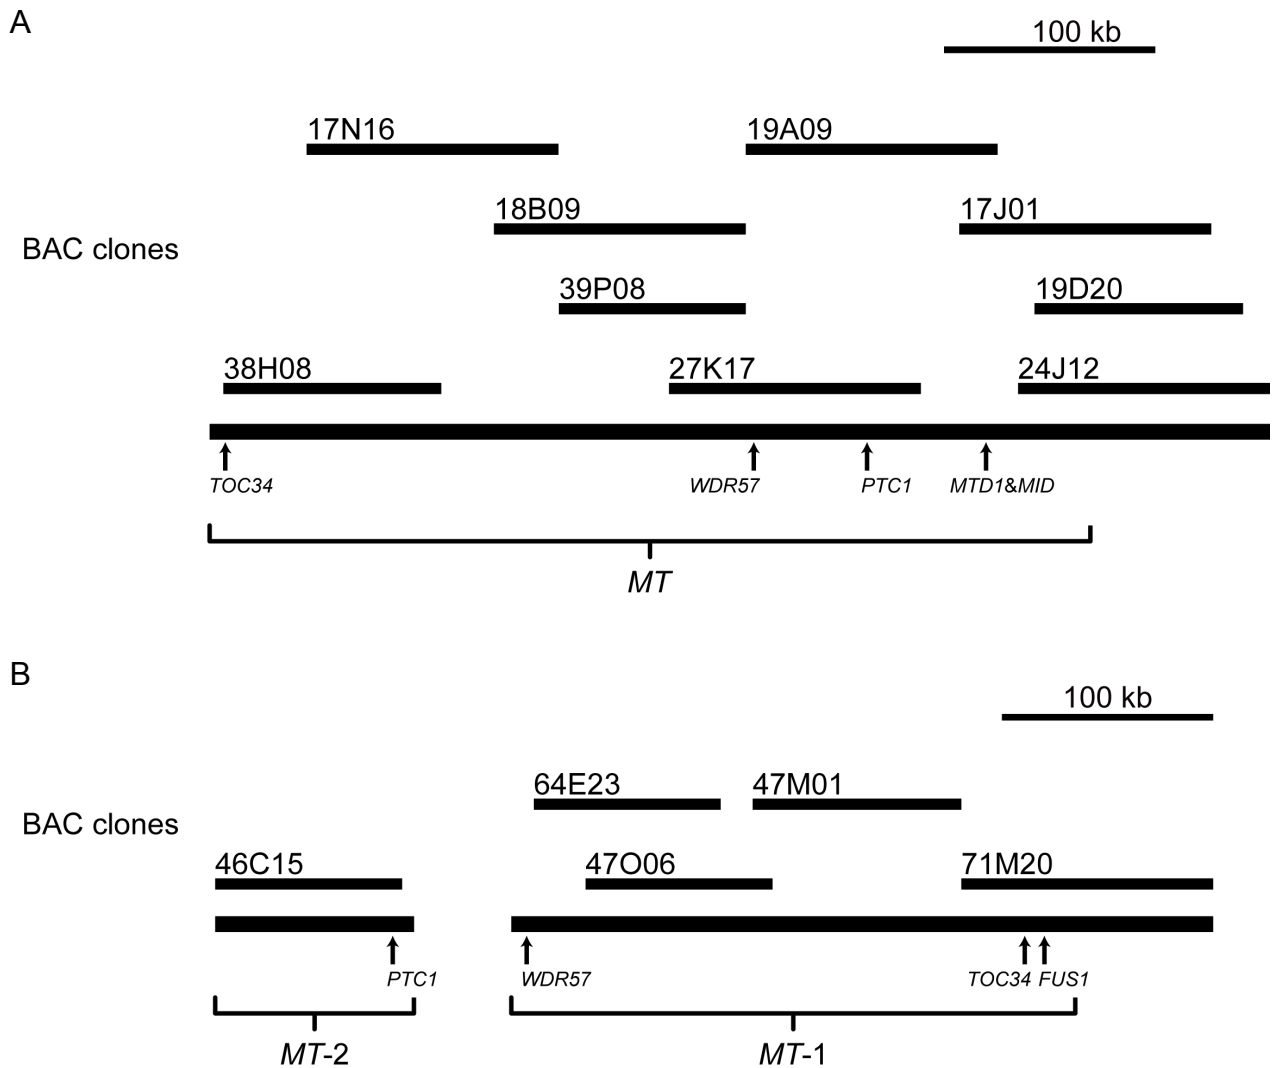

**Figure S1. BAC assembly overview of *Gonium pectorale* MT locus.** BAC clones identified and sequenced for tiling are shown above (A: *minus*; B: *plus*). The putative “rearranged” MT regions are marked with *MT* (*minus* R domain), *MT-1* and *MT-2* (*plus* R domain). Further scaffolding based on Illumina HiSeq/MiSeq paired-end and PacBio sequencing connected *MT-1* and *-2* as in Figure 1 (i.e. *PTC1* as distal from *WDR57*).
