# Supplementary material for: Sequence of the Gonium pectorale Mating Locus Reveals a Complex and Dynamic History of Changes in Volvocine Algal Mating Haplotypes
Source: Oxford University Press journal article supplement (doi:10.1534/g3.115.026229), 2016-03-08
Supplement: 026229_figures2.pdf [file 026229_figures2.pdf]

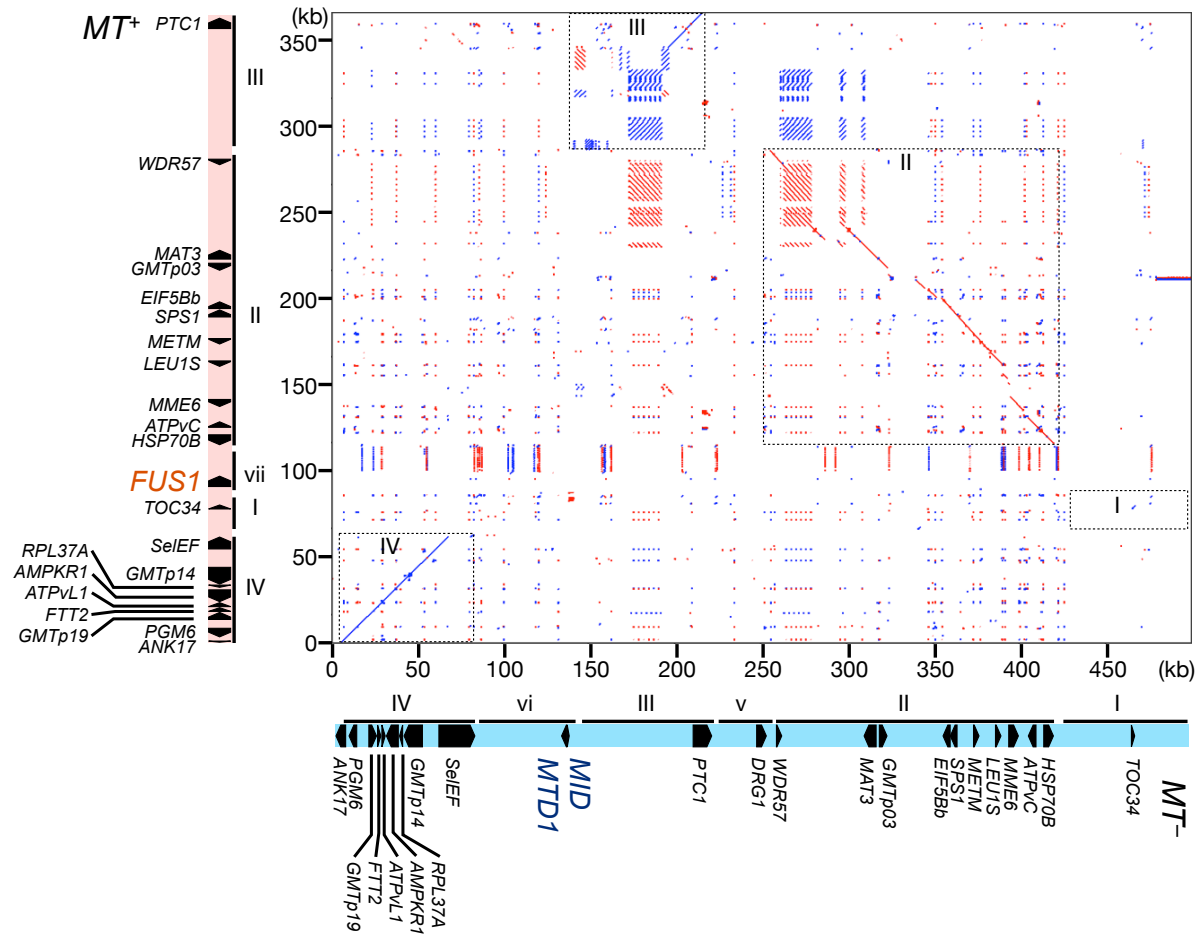

**Figure S2. Dot plot comparison of *Gonium pectorale* MT- (horizontal) and MT+ (vertical):**  
**sequences with blue, aligned in forward orientation; red, reverse. Bloc**  
**designations are corresponding to Figure 2. Syntenic blocs I-IV are bounded by**  
**dashed rectangles.**
