# Supplementary material for: Sequence of the Gonium pectorale Mating Locus Reveals a Complex and Dynamic History of Changes in Volvocine Algal Mating Haplotypes
Source: Oxford University Press journal article supplement (doi:10.1534/g3.115.026229), 2016-03-08
Supplement: 026229_figures3.pdf [file 026229_figures3.pdf]

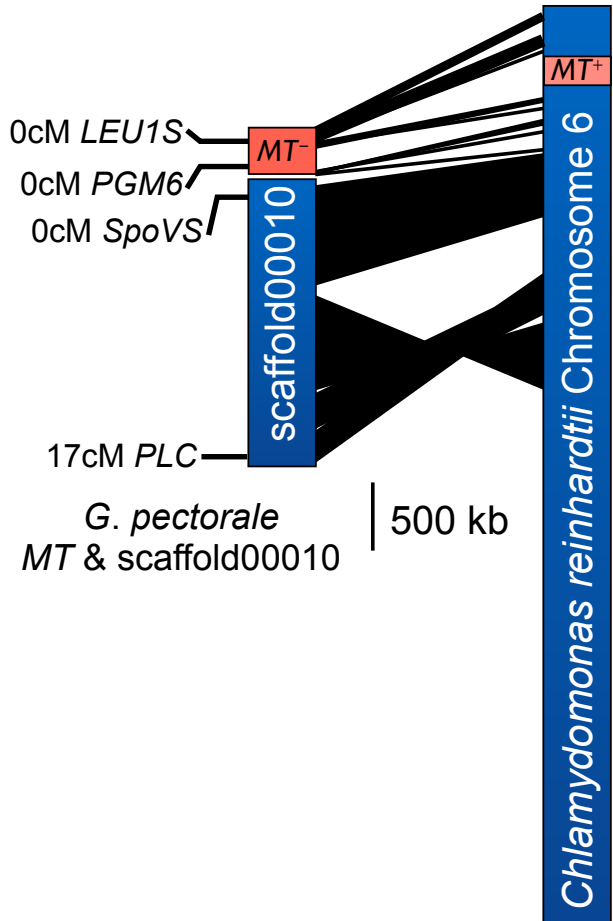

**Figure S3. Schematic diagram of syntenic relationships between the *MT* scaffold and the nearby related scaffold00010 of *Gonium pectorale* and chromosome 6 of *Chlamydomonas reinhardtii*. The linkage of genetic markers to the mating phenotype on *G. pectorale* is indicated on the left of its scaffold.**
