# Supplementary material for: Sequence of the Gonium pectorale Mating Locus Reveals a Complex and Dynamic History of Changes in Volvocine Algal Mating Haplotypes
Source: Oxford University Press journal article supplement (doi:10.1534/g3.115.026229), 2016-03-08
Supplement: 026229_figures4.pdf [file 026229_figures4.pdf]

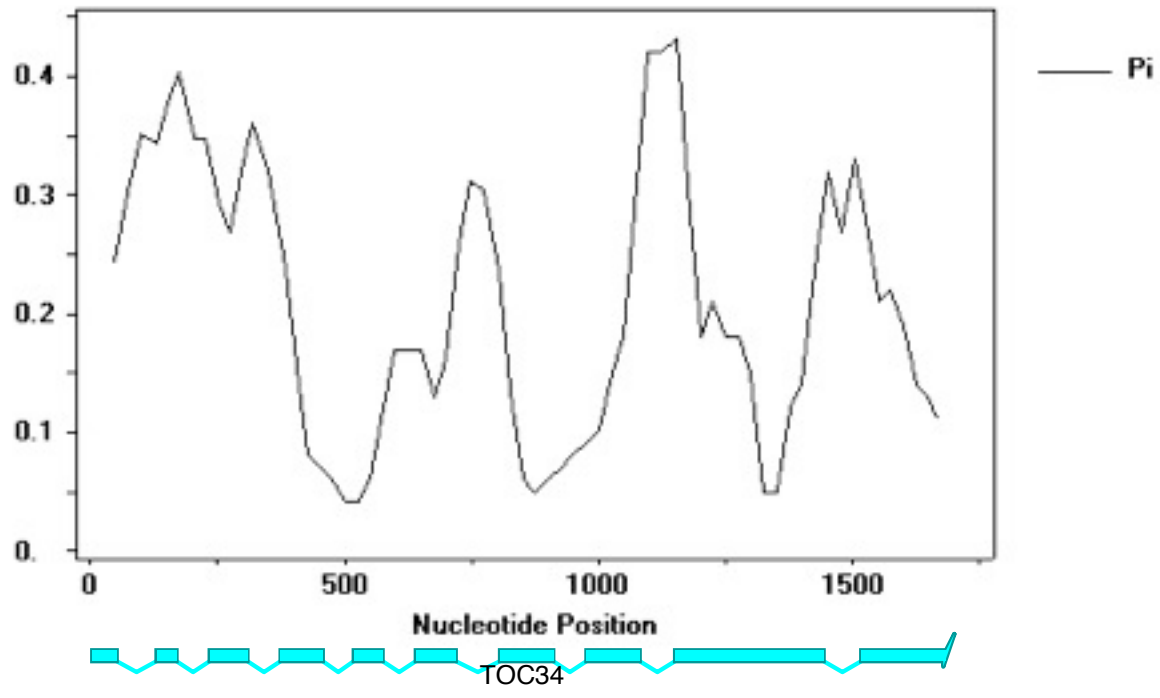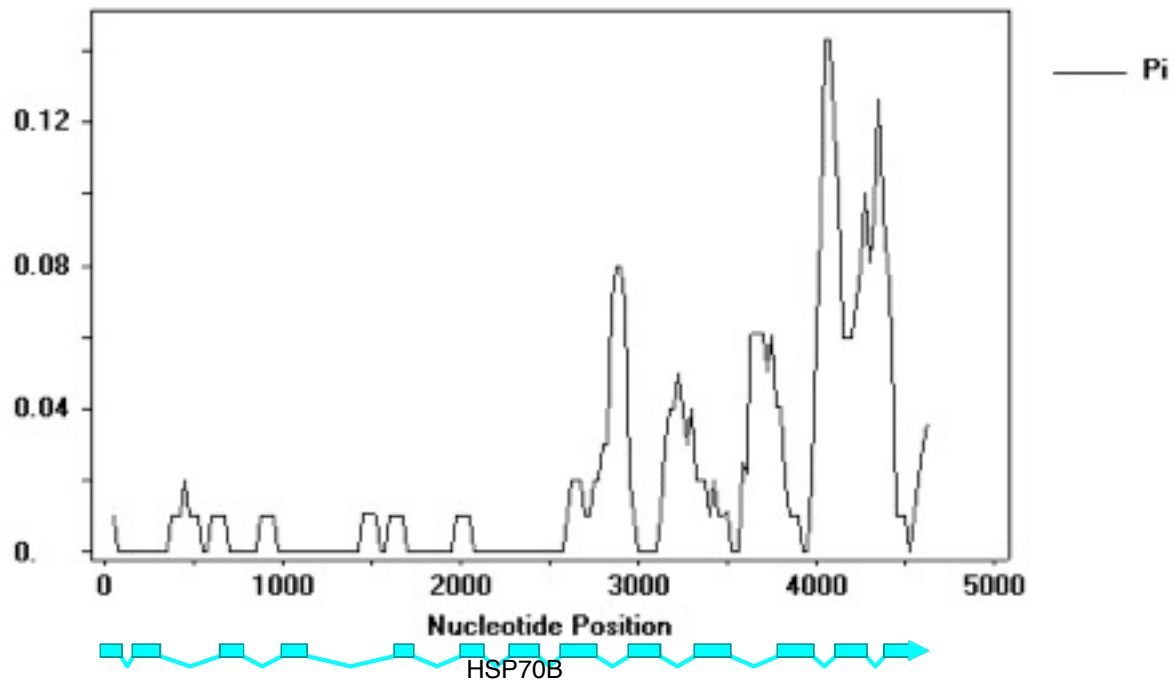

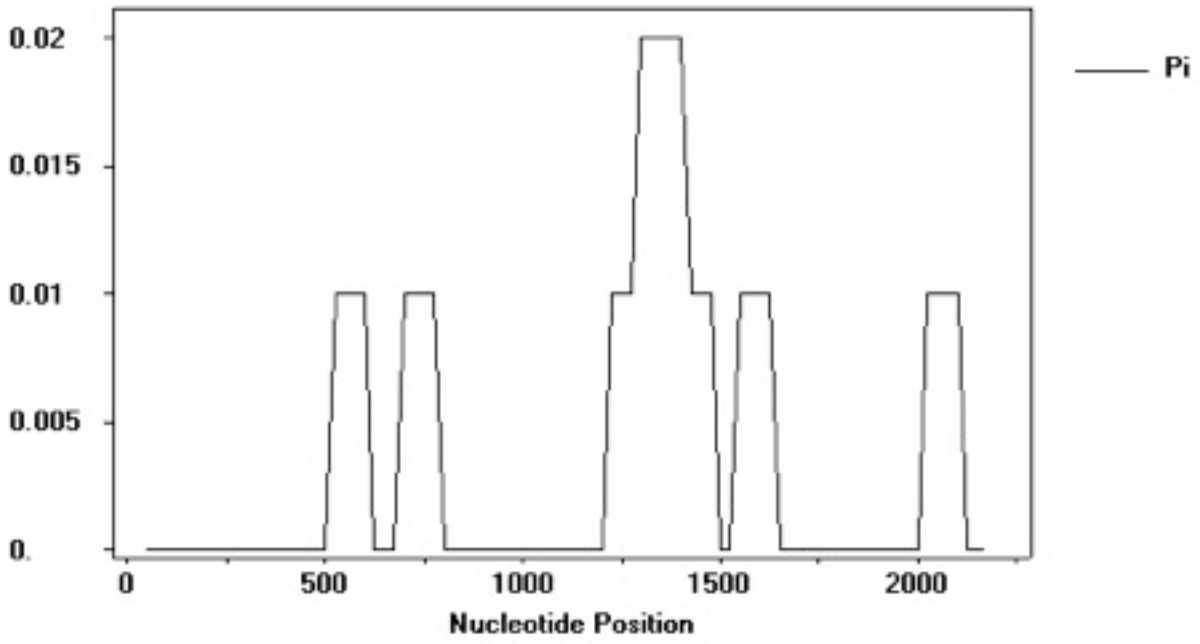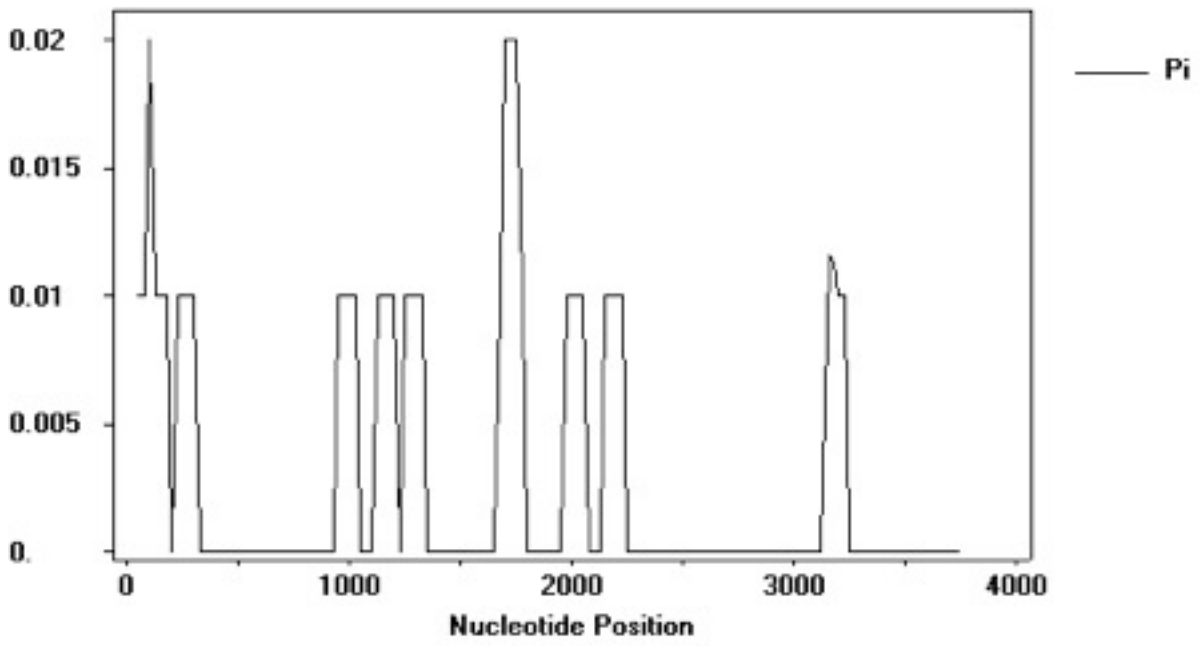

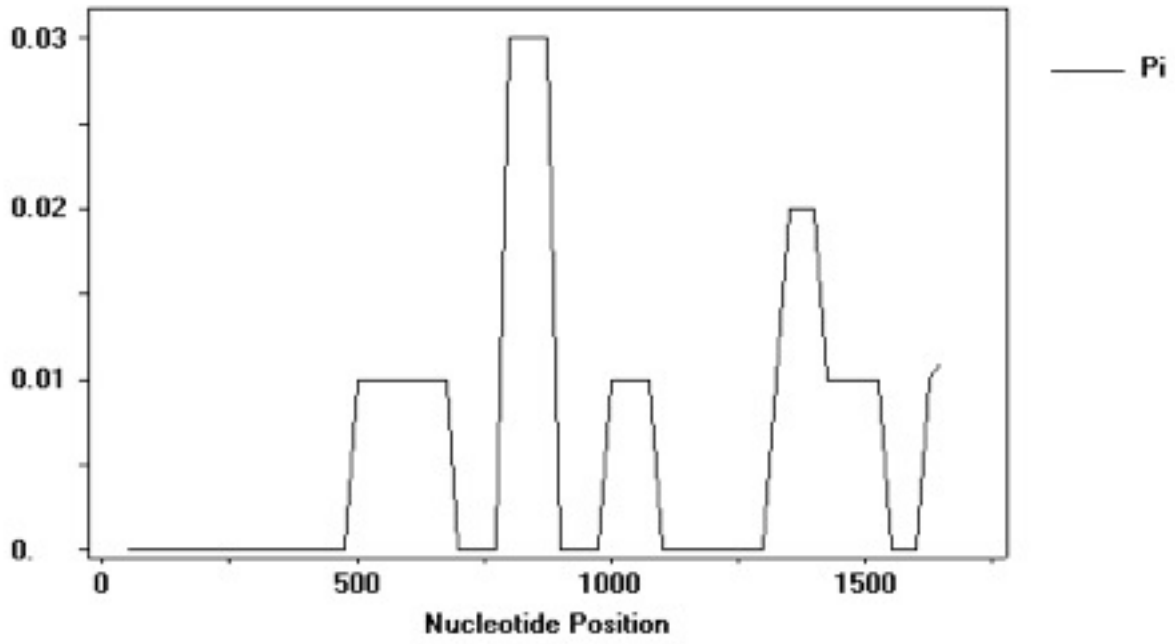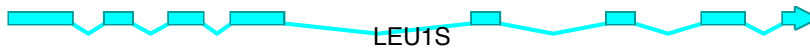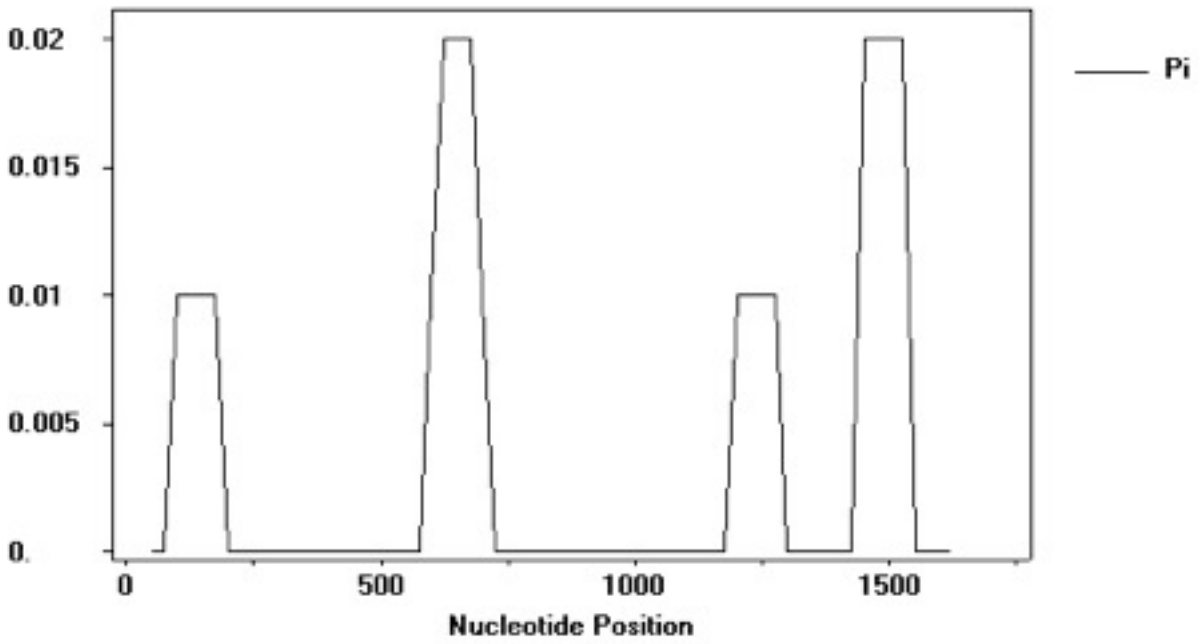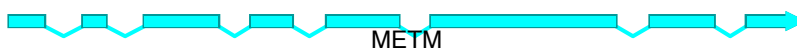

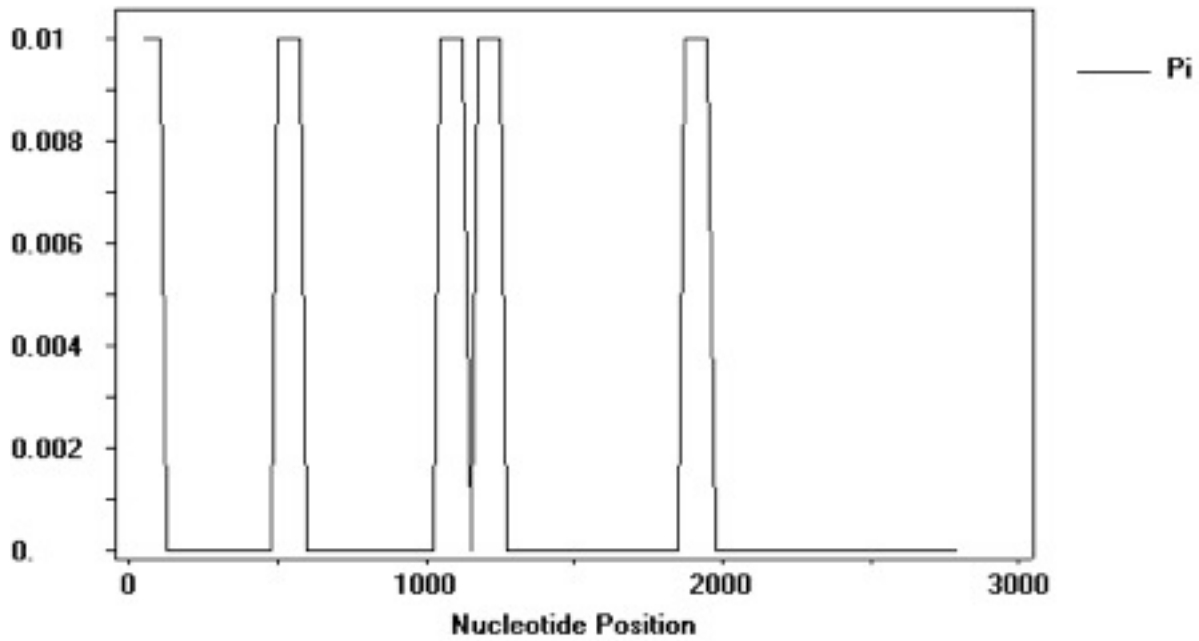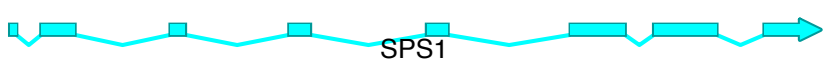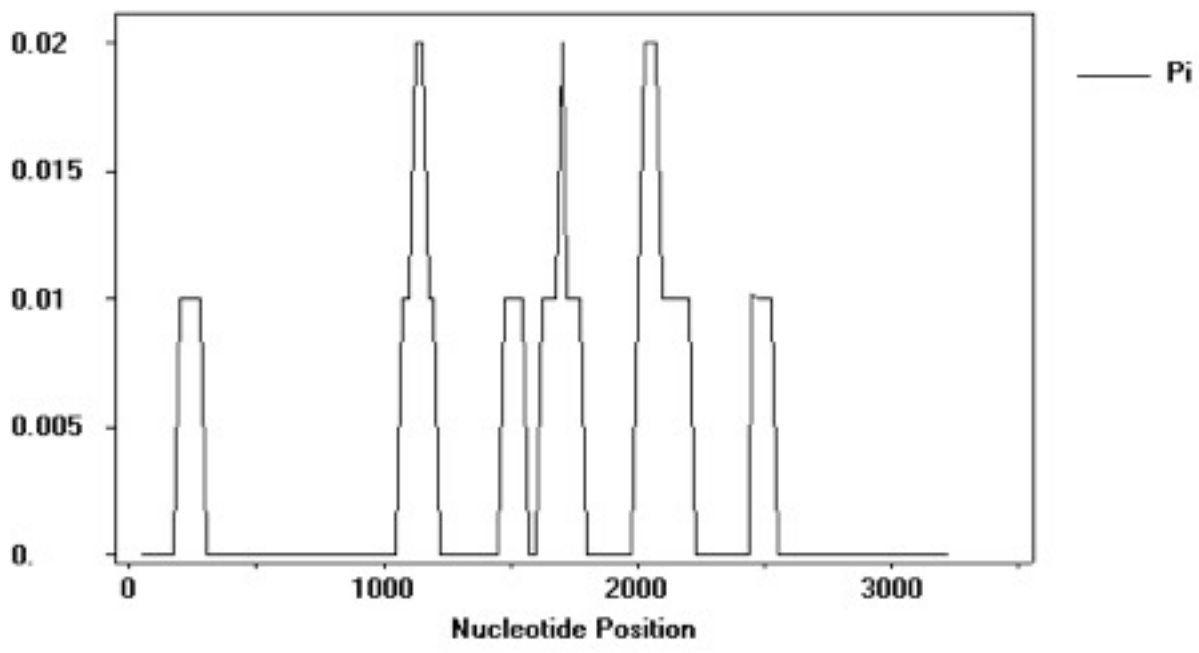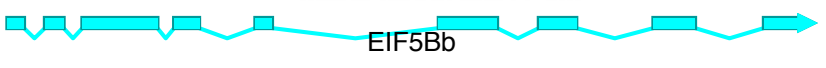

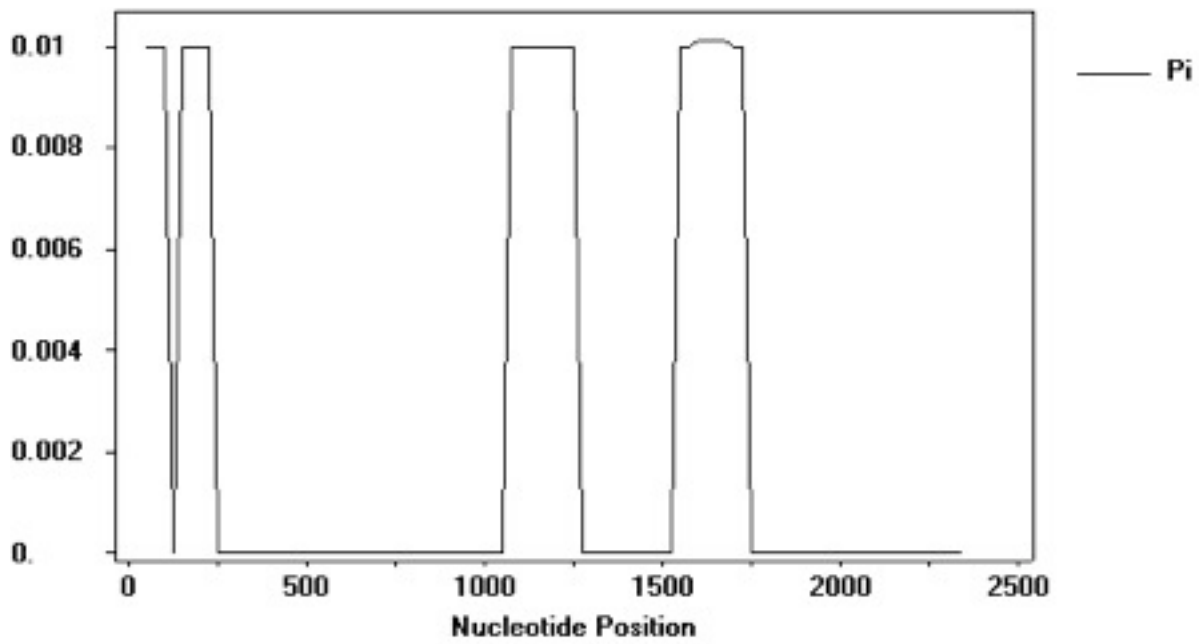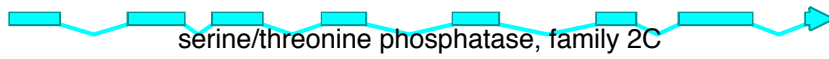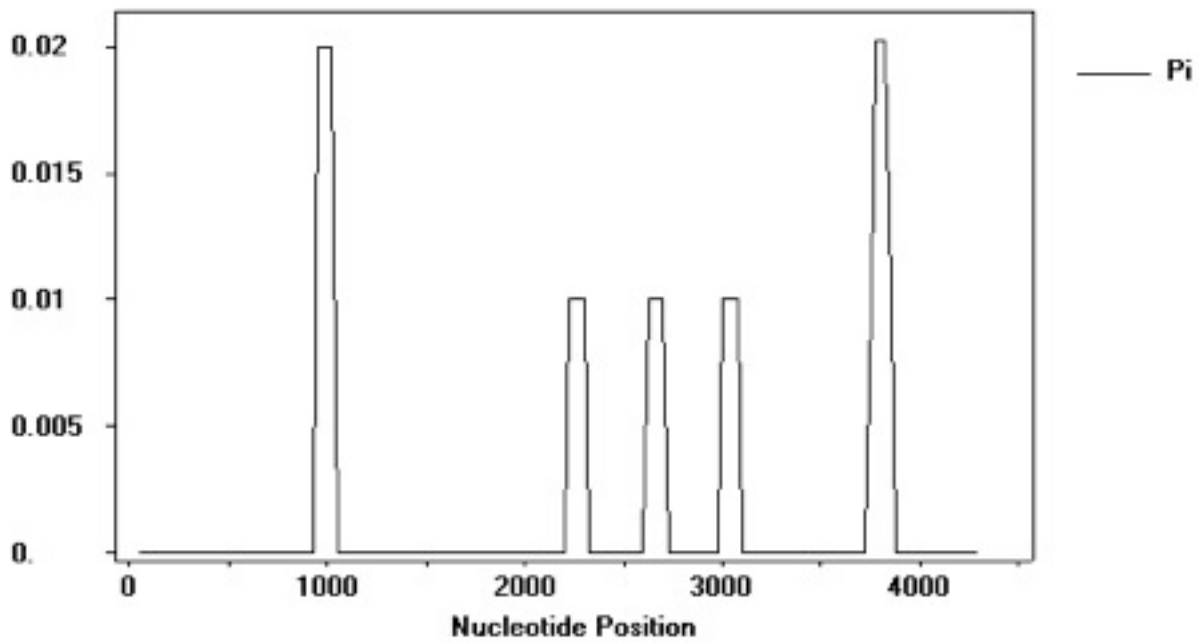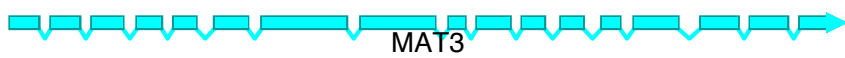

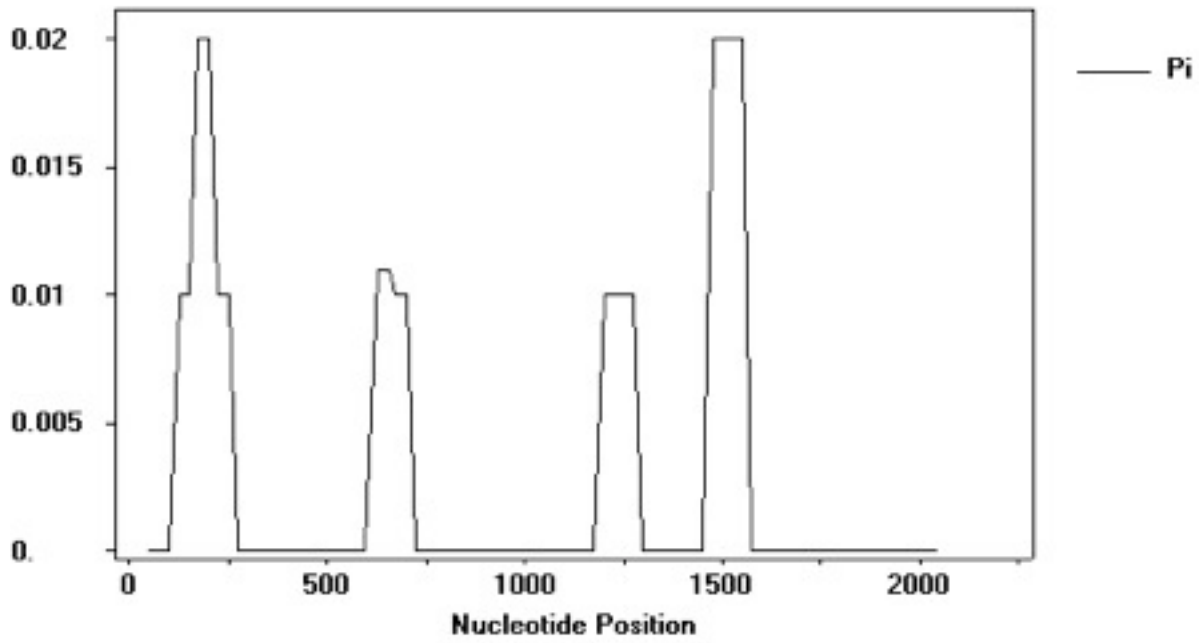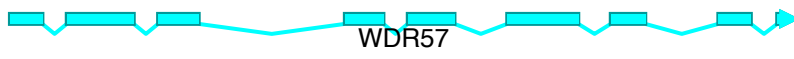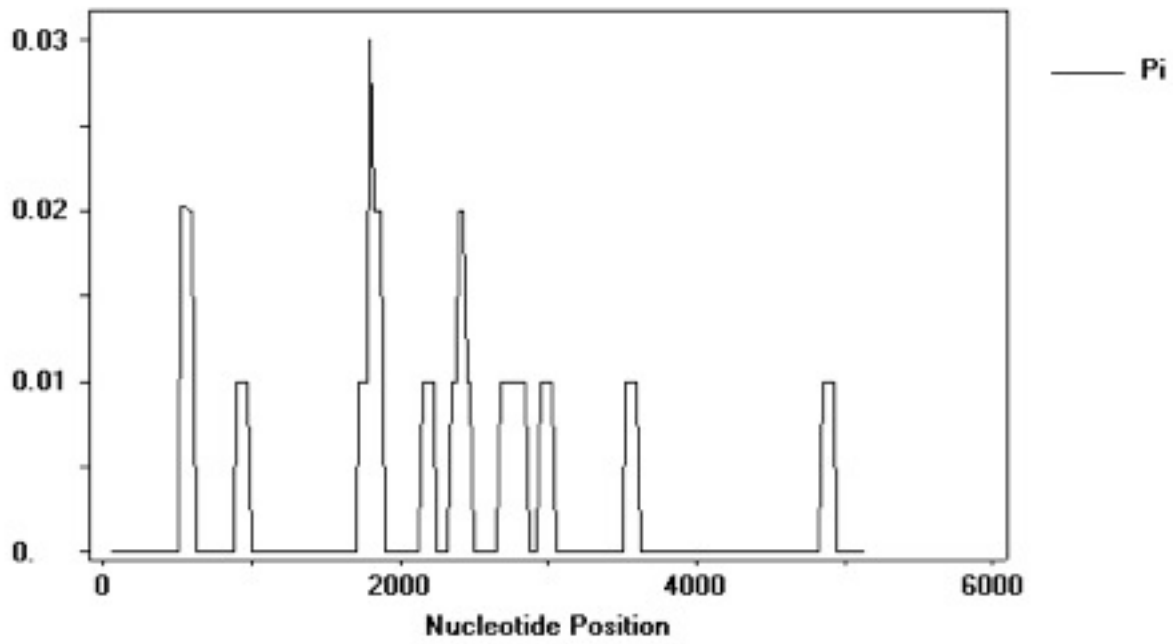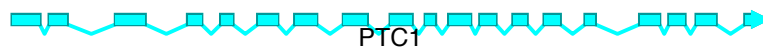

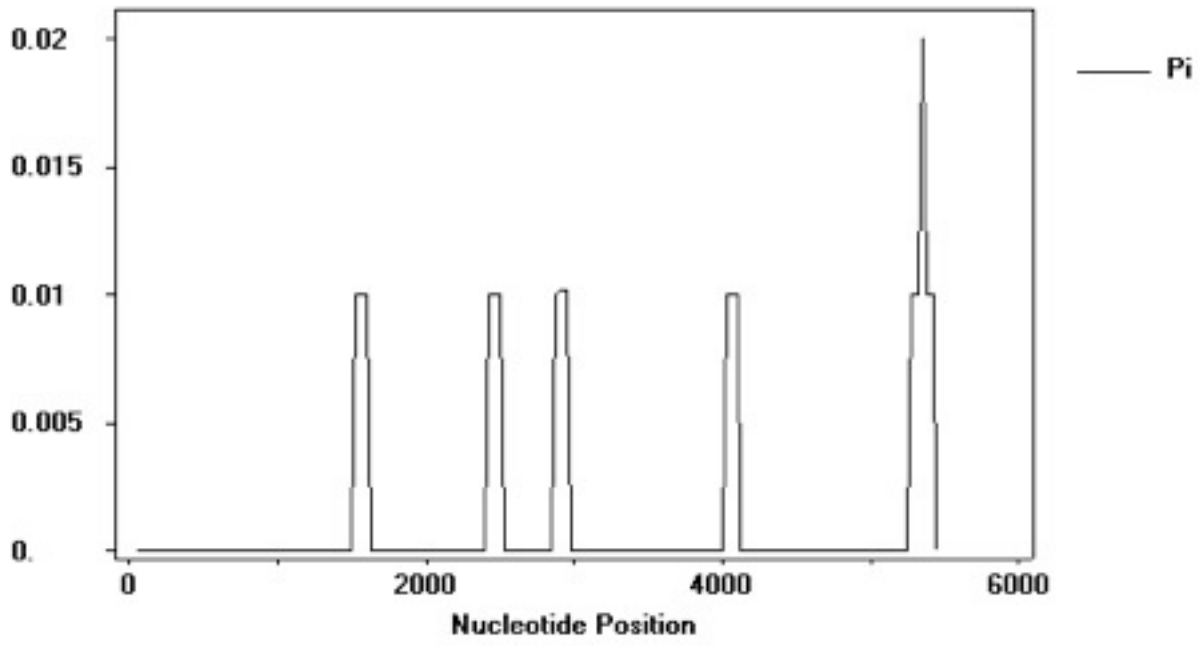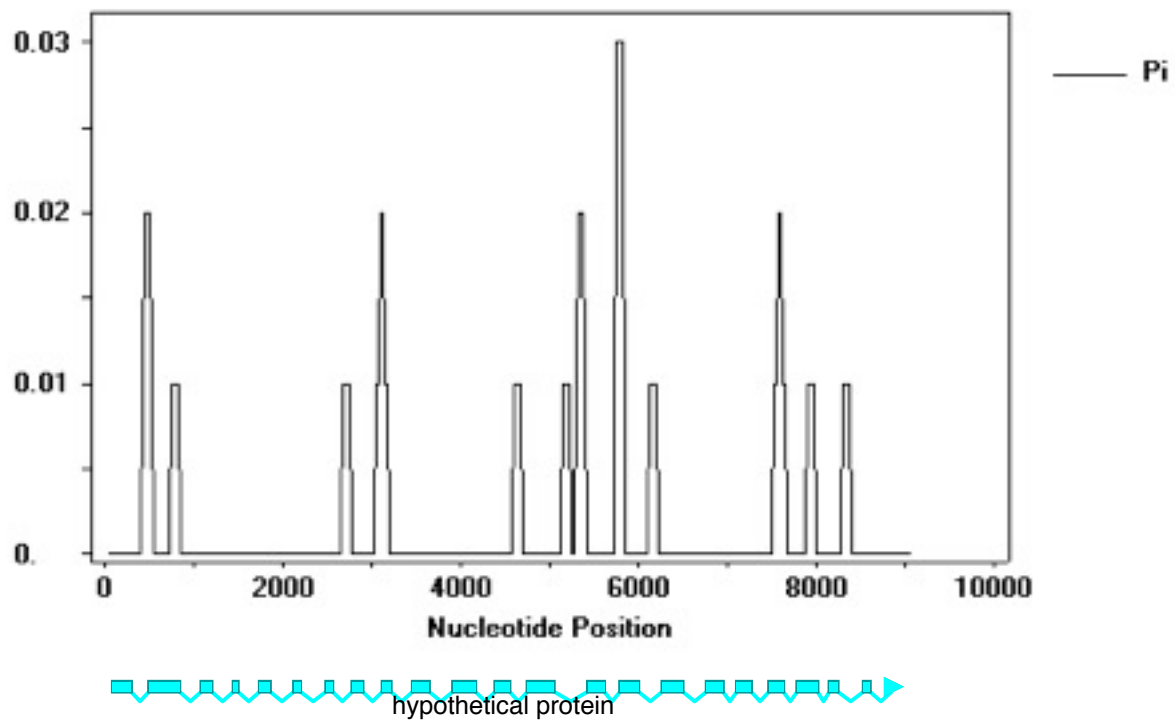

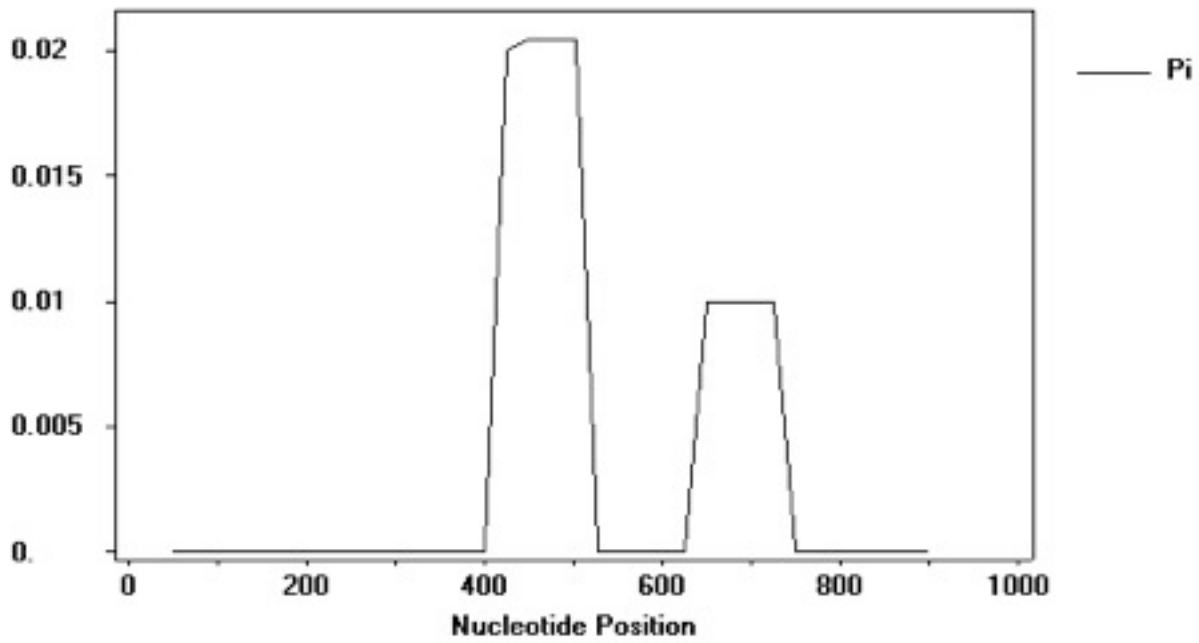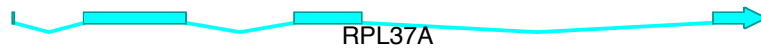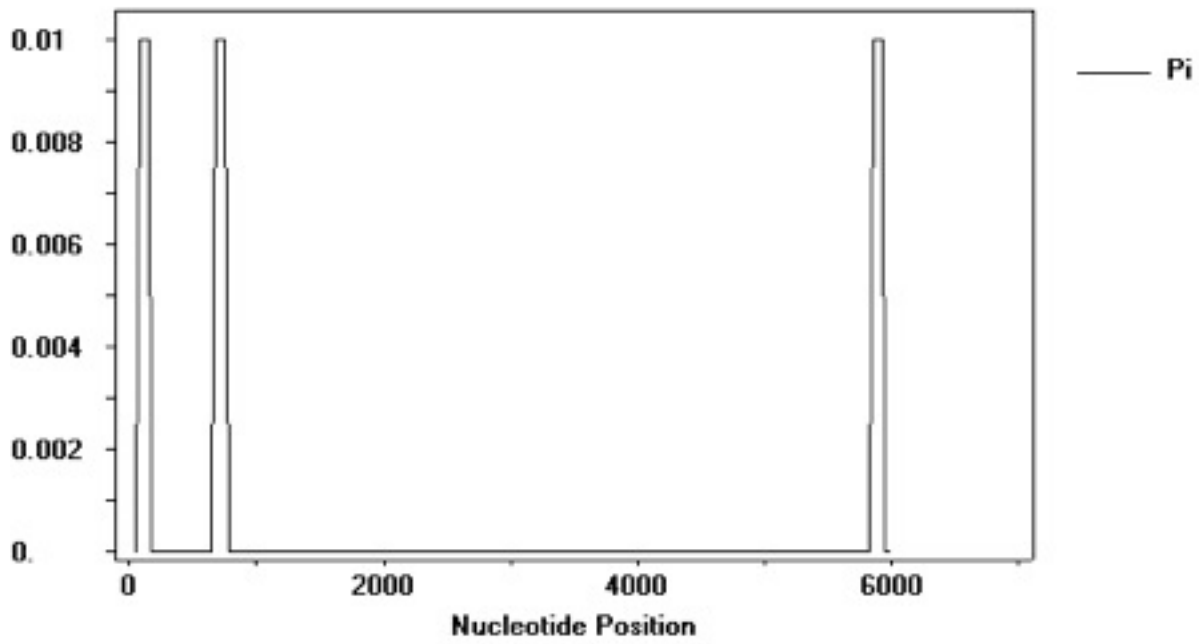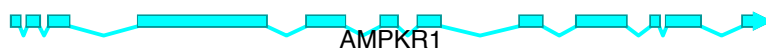



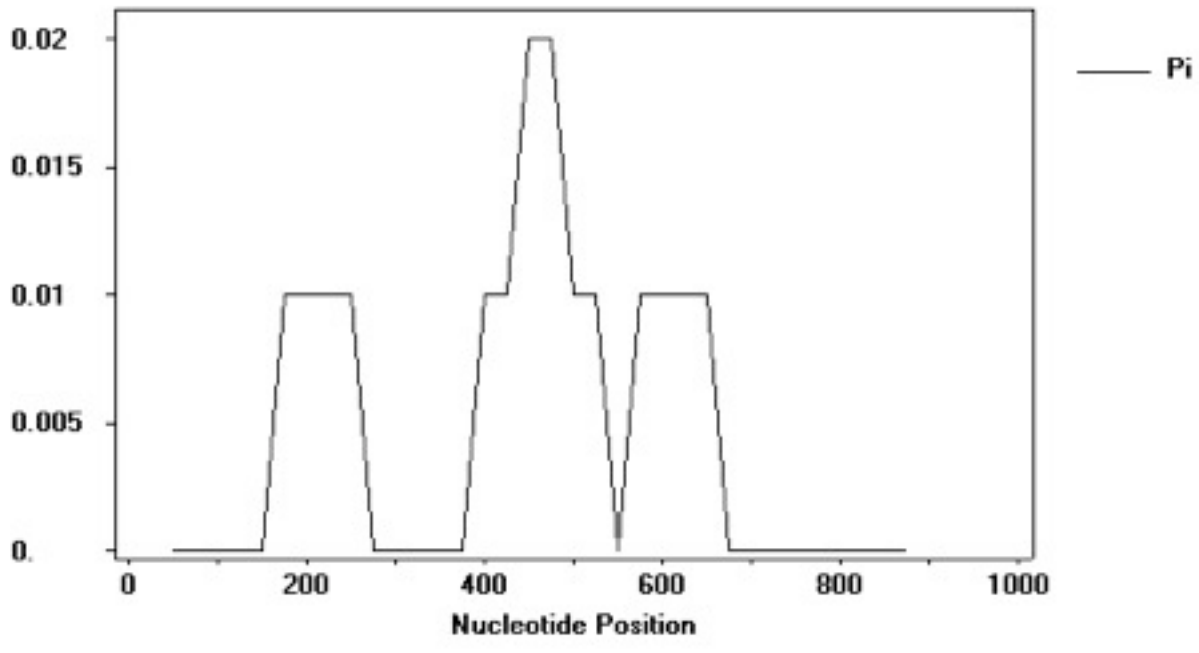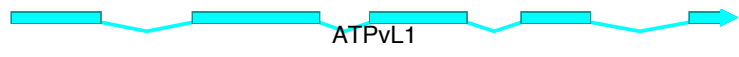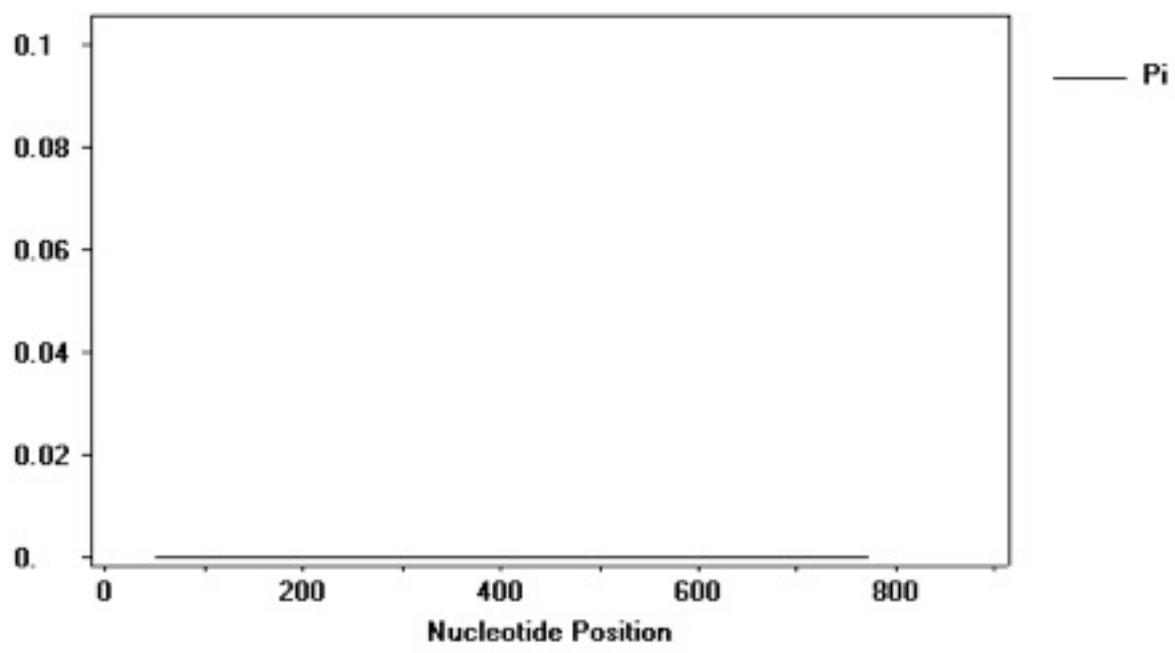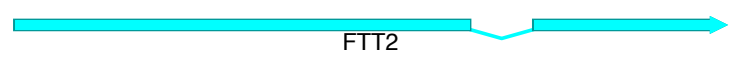

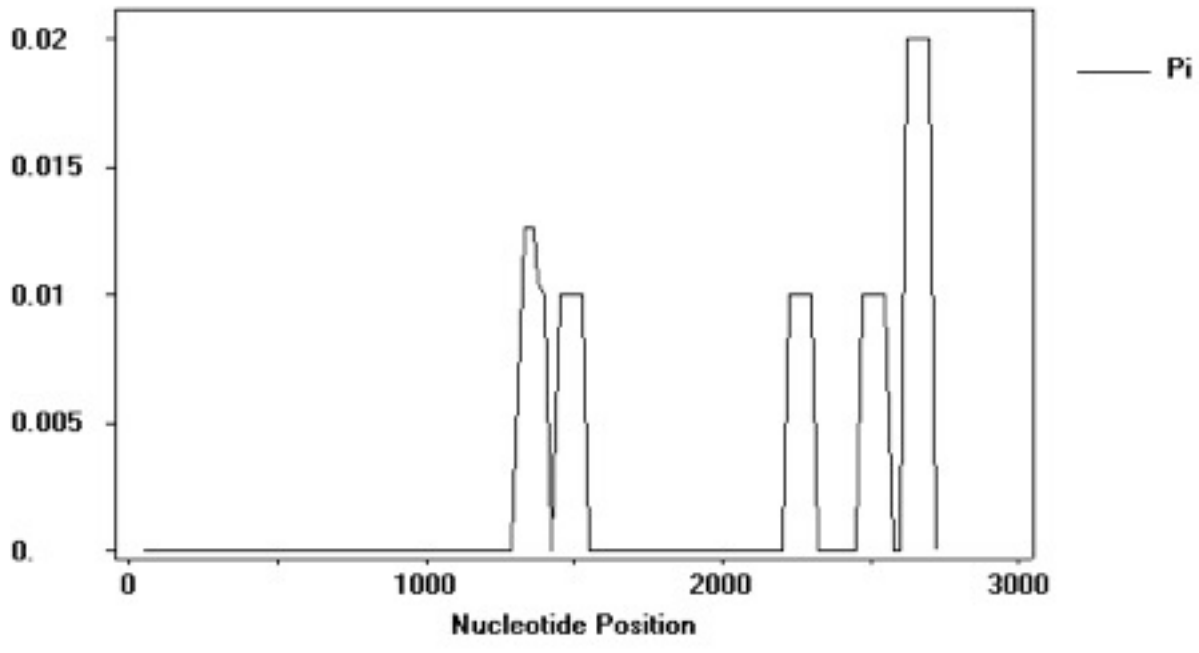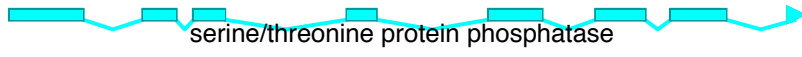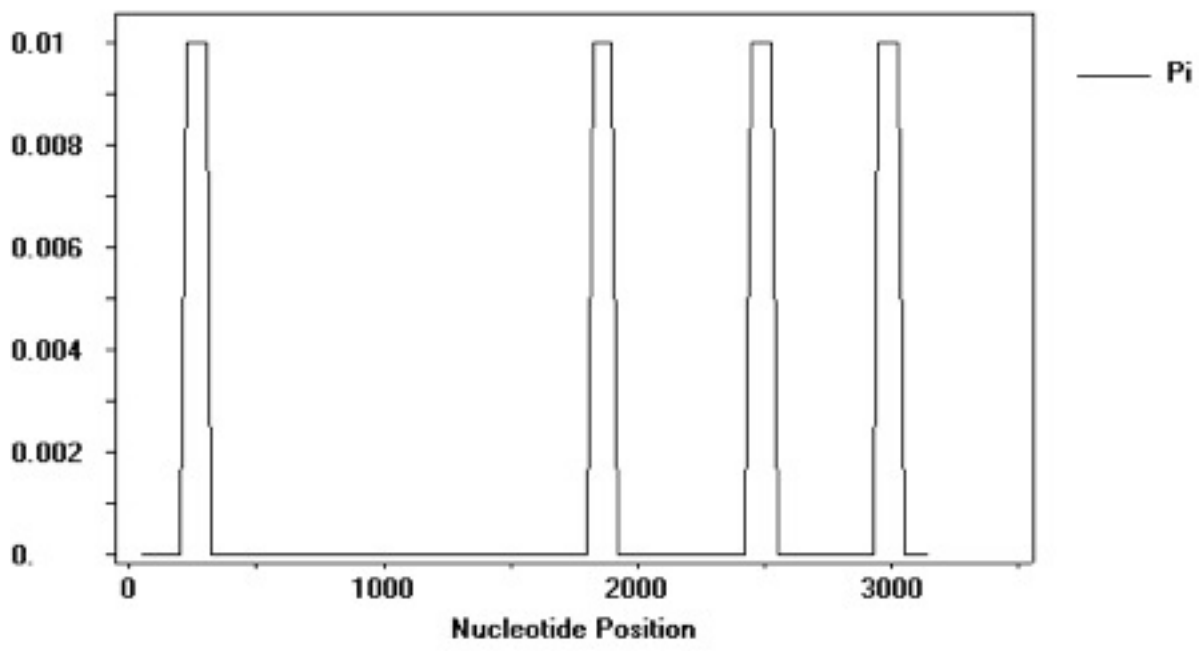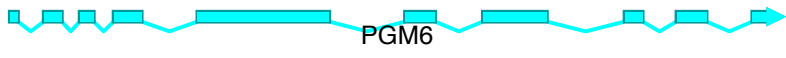

**Figure S4. Sliding window analyses of *Gonium pectorale* gametologs.** Pi values in 100 base-window of 25 base-interval were plotted from first to last codons. Each gene model is designated at the bottom of the plot.
