# Supplementary material for: Sequence of the Gonium pectorale Mating Locus Reveals a Complex and Dynamic History of Changes in Volvocine Algal Mating Haplotypes
Source: Oxford University Press journal article supplement (doi:10.1534/g3.115.026229), 2016-03-08
Supplement: 026229_figures5.pdf [file 026229_figures5.pdf]

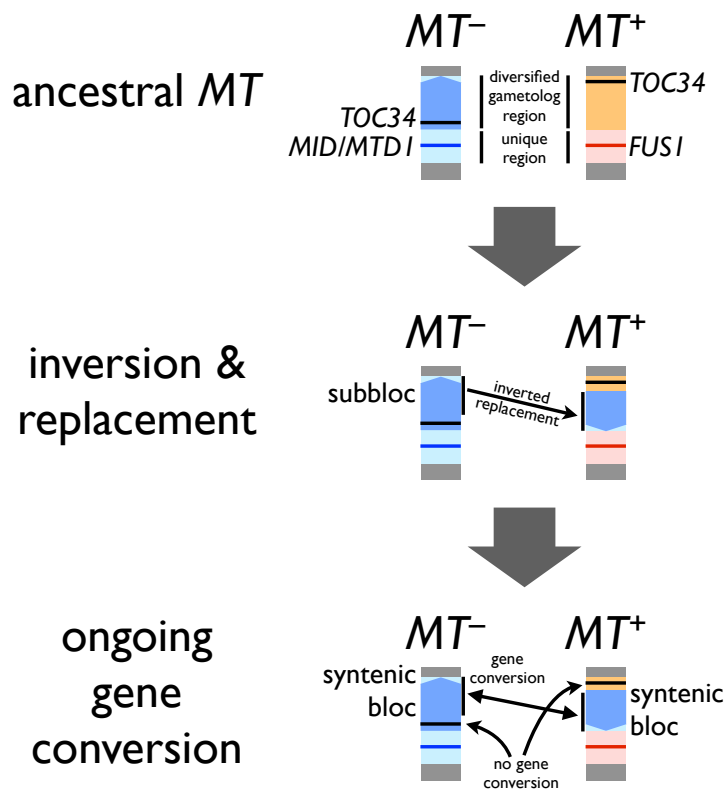

**Figure S5. A model for the observed discontinuity in sequence divergence and structure of *G. pectorale* *MT*.** Top panel. The ancestral *MT* had *MID* and *MTD* as *MT*<sup>-</sup> specific genes and *FUS1* as a *MT*<sup>+</sup> specific gene, all within unique regions of each mating type (shaded light blue and pink, respectively). The gametologs (dark blue and orange shaded regions for *MT*<sup>-</sup> and *MT*<sup>+</sup> respectively) had begun to diverge and lose recombination and/or gene conversion. *TOC34* is labeled in black. Middle panel. An inversion and replacement event occurred with a break point between *TOC34* and the adjacent gene, *HSP70B*, that copied *MT*<sup>-</sup> gametologs into *MT*<sup>+</sup>. Lower panel. The copied gametolog sequences (dark blue in *MT*<sup>+</sup>) continue to undergo gene conversion that maintains sequence homogeneity. The *TOC34* locus that was not involved in the copying event remains more diverged due to absent or reduced gene conversion between mating haplotypes (see also **Figure 3B**).
