# Supplementary material for: Sequence of the Gonium pectorale Mating Locus Reveals a Complex and Dynamic History of Changes in Volvocine Algal Mating Haplotypes
Source: Oxford University Press journal article supplement (doi:10.1534/g3.115.026229), 2016-03-08
Supplement: 026229_figures6.pdf [file 026229_figures6.pdf]

|        |     |                                                             |     |
|--------|-----|-------------------------------------------------------------|-----|
| GpFUS1 | 1   | <b>MWTEFGIVLYLICIQVFA--ODCSIVNIDNTVVLEPEGPVVAGRPYNFSSII</b> | 48  |
| CrFUS1 | 1   | <b>MPIDF--ILVLL--AAV-AKSDCSVV--AD-FKIDFQTSIFTAGNAYNITLT</b> | 45  |
| GpFUS1 | 49  | <b>LRDNDLQPVONLYDPLLAVGCPN-SEENENLCTTYSLRPLGDGVYVVSIVL</b>  | 97  |
| CrFUS1 | 46  | <b>LLDSYGDEPTCVLYDPLLSVSCPSSSSNGRDFCSLQLSPLVNGVYNIKVIP</b>  | 95  |
| GpFUS1 | 98  | <b>LTFKCAHEPWPPQYNPSARLEPDEYFTGGVTFVSVVYDEVHVPSPFFPIAVS</b> | 147 |
| CrFUS1 | 96  | <b>QTLWCGHTVWPEPYSVAELPDVYFACDTAIRITYNGRDIQGSPPFVTVO</b>    | 145 |
| GpFUS1 | 148 | <b>PAEELSAALSVMVDPVSGSSGRMELVARLYQVTDYSNWIWIRNPDLINA</b>    | 197 |
| CrFUS1 | 146 | <b>AEPHISTALSIVNVAVPAKCVASSREAIAYFYQISDRFTNWIREKSIATQ</b>   | 195 |
| GpFUS1 | 198 | <b>ISVKSASTGVSFALQWQWQWIEILARSEQSCNYSLEVLVQYPDGRAEPL</b>    | 247 |
| CrFUS1 | 196 | <b>LRVS--AYPDADISVQWQWQWIVLYANSTAGMYRFOVYFIDDDGSEVEI</b>    | 244 |
| GpFUS1 | 248 | <b>RIQS-AKGISFSGSFEVRPGVLEISNFDVKVSNTOIVAGSLYHVTVQSRD</b>   | 296 |
| CrFUS1 | 245 | <b>RILSPGLGLSYDGSFEVLELALDEAKITASGLPQEVVACIPVSLTLOAMD</b>   | 294 |
| GpFUS1 | 297 | <b>RESNPTPLSDPAQYTTWLEOVQNSSIVTMSISSSG-HVQLEE-IVNATISP</b>  | 344 |
| CrFUS1 | 295 | <b>IYSNPTRLVDEPSYQPFQOPDNKTLQVRLVTVDSGALQENVVAIPTNT</b>     | 344 |
| GpFUS1 | 345 | <b>GGLAQWHIREREATSYRMVITYHGSVMAVLFSAVDVVPGPPSFSKSTFD</b>    | 394 |
| CrFUS1 | 345 | <b>TGACSWSITEFTSMDYSVSVTYKESVLMHFS---ITVRNAQASPSNSTAL</b>   | 391 |
| GpFUS1 | 395 | <b>IKDTFEAGPLLIVARFADWGNPTLGSANVVVSELKNGAQLLPSERAVN-</b>    | 443 |
| CrFUS1 | 392 | <b>LPEIQAGTTHLYVTPTWGN-IAPLANNDLSIGLTGSTFFHSTFVPEP</b>      | 440 |
| GpFUS1 | 443 | <b>----QEVVYSVNIIFRAGAMAVRISIGADALVRNITVPIPLRTISLHDSWVS</b> | 489 |
| CrFUS1 | 441 | <b>VRKGDYSVYSLTTEAGLVVVSLOLHNSWLEKNITTEASYPSLQRSYVL</b>     | 490 |
| GpFUS1 | 490 | <b>GYGAGSLSAFGPTFVTAGVOYSVWVHAYDIYGNQLHKDSNCCGLOIGGAG</b>   | 539 |
| CrFUS1 | 491 | <b>GFGAGDPYGFAPTPLVAGEQYVLRVFIKDLVGNLTIQAD-KVVDLNIIVCPG</b> | 539 |
| GpFUS1 | 540 | <b>PTAVMTDIEEDTGKLGFSYNIITVSGNYTVSLATTEGFLHGGFIOVRSQAQ</b>  | 589 |
| CrFUS1 | 540 | <b>QVLMNMSMLPSGAFEVIYQPIVVGVIYAVIANLITGLLLHRCAVYVQPGTF</b>  | 589 |
| GpFUS1 | 590 | <b>QYQRTKMYFPSTAVAGMSFYATVEFTDSEGNPAPVTGVLSVLIITG-CVQT</b>  | 638 |
| CrFUS1 | 590 | <b>NPNAITLQVPDYIVAGEASSFKLAFHDSYGNAAASSGEASVVVFKYCGES</b>   | 639 |
| GpFUS1 | 639 | <b>HTTEVAMNGDCNATISLOLOVASTYAYGYMNGIILGSTASAVVILPATP</b>    | 688 |
| CrFUS1 | 640 | <b>LSFPLNLSCKFIEELPFRIMHSGLYAFSISVNSVIVKSNNGYLHVVEGSA</b>   | 689 |
| GpFUS1 | 689 | <b>AKAAEAAILGAGVDTVRLAYSFYDAYDNMIYVKDLEDGLGIALEPVRPWEA</b>  | 738 |
| CrFUS1 | 690 | <b>YALNITELKMTDRLLLEVYAYVVDEMLNSLNAAAMTA-FAVALDEPILFHG</b>  | 738 |
| GpFUS1 | 739 | <b>NVTFERSNSMSISLWYEPSSPOOITVIFRGVALHTYVWTSVVPMQEDIL</b>    | 788 |
| CrFUS1 | 739 | <b>NVTLIS-STGITLQDKDE-AIENTLOVOLKISNTIFENCQWKPAAHATI</b>    | 786 |
| GpFUS1 | 789 | <b>RKRWRG-IVASACGALLGCSLLICVVTQVSRHTP</b>                   | 824 |
| CrFUS1 | 787 | <b>RRVRSIGPLIATITAVCVILFASIALVWSFRMDRHKP</b>                | 823 |

**Figure S6. Alignment of the amino acid sequences of the GpFUS1 and CrFUS1 proteins.**

Identical or similar residues have solid or shaded backgrounds, respectively.

Underlined residues are aligned in Figure S7. The GC content of *GpFUS1* CDS and introns are moderate (~50%), showing a common feature found in most of the previously identified mating type-specific genes (*CrFUS1*: 47.7%; *CrMID*: 50.5%; *GpMID*: 52.9%; *GpMTD1*: 55.5%).
