# Supplementary material for: Sequence of the Gonium pectorale Mating Locus Reveals a Complex and Dynamic History of Changes in Volvocine Algal Mating Haplotypes
Source: Oxford University Press journal article supplement (doi:10.1534/g3.115.026229), 2016-03-08
Supplement: 026229_figures8.pdf [file 026229_figures8.pdf]

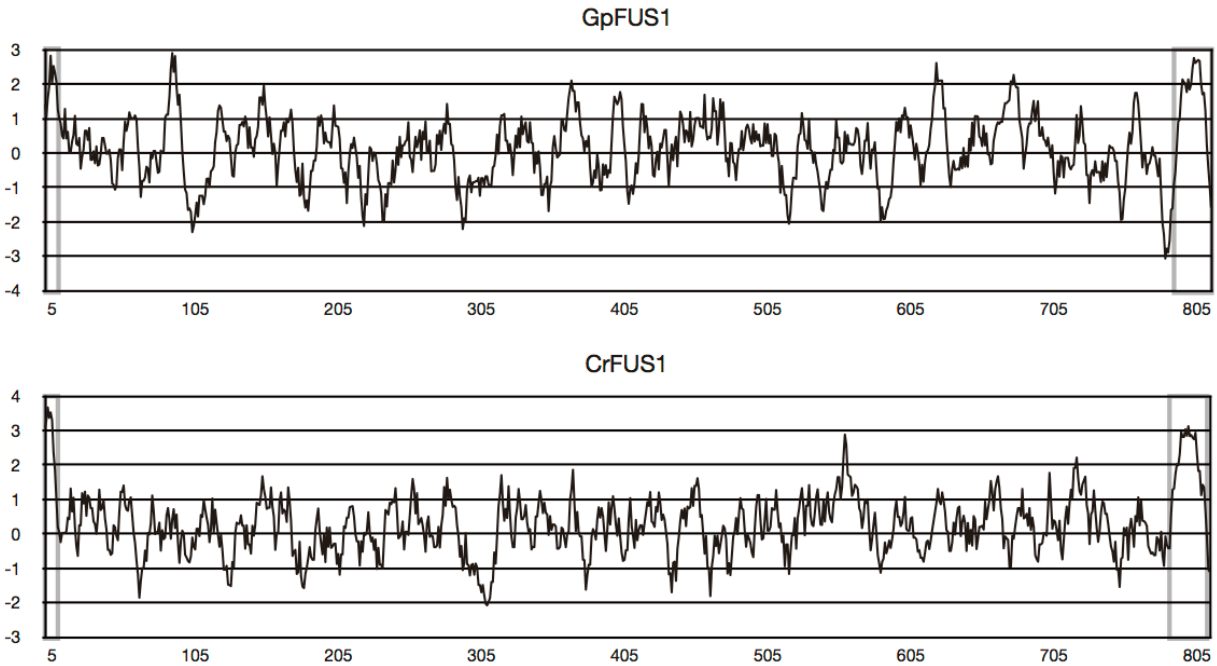

**Figure S8. Comparison of FUS1 hydrophobicity.** Hydrophobicity plots of GpFUS1 and CrFUS1 by ExPASy are shown. Hydrophobic regions in N- (GpFUS1: 13 residues; CrFUS1: 14 residues) and C-termini (both GpFUS1 and CrFUS1: 29 residues) are boxed in grey. Hydrophobicity plots predict a N-terminal signal peptide and C-terminal transmembrane domain in FUS1 homologs from both species, while secondary structure predictions vary between them.
