# Supplementary material for: Sequence of the Gonium pectorale Mating Locus Reveals a Complex and Dynamic History of Changes in Volvocine Algal Mating Haplotypes
Source: Oxford University Press journal article supplement (doi:10.1534/g3.115.026229), 2016-03-08
Supplement: 026229_figures9.pdf [file 026229_figures9.pdf]

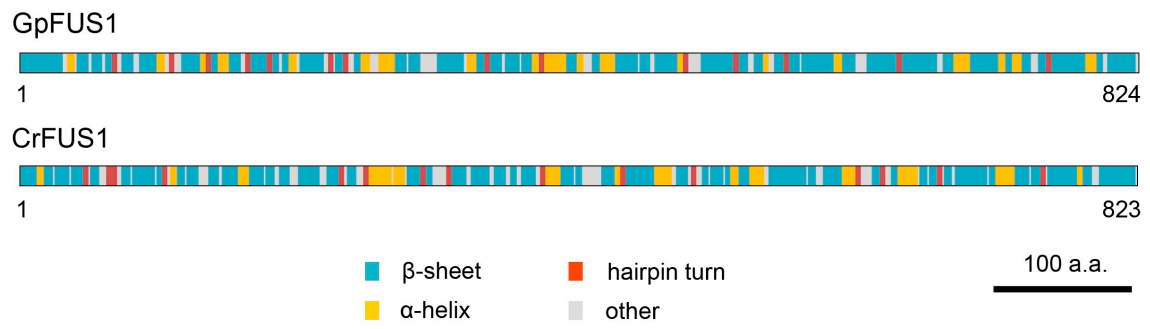

**Figure S9. Schematic comparison of structure predictions for FUS1 proteins.**
