# Supplementary material for: Sequence of the Gonium pectorale Mating Locus Reveals a Complex and Dynamic History of Changes in Volvocine Algal Mating Haplotypes
Source: Oxford University Press journal article supplement (doi:10.1534/g3.115.026229), 2016-03-08
Supplement: 026229_tables1.pdf [file 026229_tables1.pdf]

**Table S1. Primers used in this study. Primers used for AFLP analyses are indicated with their restriction enzymes and digest sizes for Mongolia 1 or 4 genotypes.**

| Marker or product | Primer name | Oligo DNA sequence       | Restriction enzyme for AFLP | Mongolia 1 fragment (approx.) | Mongolia 4 fragment (approx.) |
|-------------------|-------------|--------------------------|-----------------------------|-------------------------------|-------------------------------|
| LEU1S             | GPLEUFATG   | ATGCTGCTCCAAAGGTGGC      |                             |                               |                               |
| LEU1S             | GPLEURTAA   | TTACGCCACTTTGATCATGCC    |                             |                               |                               |
| FUS1              | GpFUS1AF    | TACCCTGATGGTCGTGCGGAAC   |                             |                               |                               |
| FUS1              | GpFUS1AR    | GTTCCGCACGACCATCAGGGTA   |                             |                               |                               |
| FUS1              | GpFUS1BF    | AGCGGCAGTTTTGAAGTTCGC    |                             |                               |                               |
| FUS1              | GpFUS1BR    | GCGAACTTCAAACCTGCCGCT    |                             |                               |                               |
| FUS1              | GpFUS1CF    | AACACCTCTGAGTGATCCCGC    |                             |                               |                               |
| FUS1              | GpFUS1CR    | GCGGGATCACTCAGAGGTGT     |                             |                               |                               |
| FUS1              | YM001F      | CACCGTCTACGTGGTGTCCCTT   |                             |                               |                               |
| FUS1              | YM001R      | CTATGAGACCCAGCTGTCATGTAG |                             |                               |                               |
| PGM6              | PGM6-3F     | GACCTTCCTGCACATGCT       | SmaI                        | 355+185                       | 230+185+125                   |
| PGM6              | PGM6-4R     | CGAGGCCGTCCAATGTC        |                             |                               |                               |
| SpoVS             | SpoVS-1F    | CATTGGAGCGGAGAGCATAAA    | HindIII                     | 300+200                       | 500                           |
| SpoVS             | SpoVS-2R    | TAGAGCGCCAGACTCTTCTT     |                             |                               |                               |
| PLC               | PLC-1F      | GCTGCCATGCTACTTCATCT     | Scal                        | 600                           | 450+150                       |
| PLC               | PLC-1R      | TTGAACGTGTCCAGCTCTATG    |                             |                               |                               |
| UNC50             | UNC50-1F    | TCATCGTCGTTTGCTGTACG     | NcoI                        | 230+170                       | 400                           |
| UNC50             | UNC50-2R    | CCAAGCAGCAGGAAGTCAA      |                             |                               |                               |
| PRX1              | PRX1-3F     | GACCGCTTCAAGGAGTTCAA     | EaeI                        | 320                           | 260+60                        |
| PRX1              | PRX1-4R     | TCGACTGCACGTACTGGATA     |                             |                               |                               |
| MTF1109           | MTF1109-1F  | CCATGATGAGCGACGAGATTAG   | NotI                        | 400                           | 200+200                       |
| MTF1109           | MTF1109-2R  | CCCAGCACCGCAATCTT        |                             |                               |                               |
| DRG1              | MongDRG1F   | CAAGAAGCCGCCGAGTATAAC    | KpnI                        | 450                           | 290+170                       |
| DRG1              | MongDRG2R   | CGGCGTCCAGGTCTATCTT      |                             |                               |                               |
