# Supplementary material for: Sequence of the Gonium pectorale Mating Locus Reveals a Complex and Dynamic History of Changes in Volvocine Algal Mating Haplotypes
Source: Oxford University Press journal article supplement (doi:10.1534/g3.115.026229), 2016-03-08
Supplement: 026229_tables2.pdf [file 026229_tables2.pdf]

**Table S2. Presence or absence of mating type/sex specifically coded genes in volvocine *MT* loci. Blanks (-) indicate absence. *V. carteri MTD1* is considered to be a pseudogene (Ferris et al. 2010).**

| query/gene name | Volvox        | Chlamydomonas | Gonium       |
|-----------------|---------------|---------------|--------------|
| <i>FSI1f</i>    | Female        | -             | -            |
| <i>HMG1f</i>    | Female        | -             | -            |
| <i>MTF0821</i>  | Female        | -             | -            |
| <i>MTF0991</i>  | Female        | -             | -            |
| <i>MTF2030</i>  | Female        | -             | -            |
| <i>MTM0097</i>  | Male          | -             | -            |
| <i>MTM0441</i>  | Male          | -             | -            |
| <i>MTM0564</i>  | Male          | -             | -            |
| <i>MTM0665</i>  | Male          | -             | -            |
| <i>MTM0761</i>  | Male          | -             | -            |
| <i>MTM0832</i>  | Male          | -             | -            |
| <i>MTM0897</i>  | Male          | -             | -            |
| <i>MTM0946</i>  | Male          | -             | -            |
| <i>MID</i>      | Male          | <i>minus</i>  | <i>minus</i> |
| <i>MTD1</i>     | Male (pseudo) | <i>minus</i>  | <i>minus</i> |
| <i>FUS1</i>     | -             | <i>plus</i>   | <i>plus</i>  |
| <i>MTA1</i>     | -             | <i>plus</i>   | -            |
| <i>EZY2</i>     | -             | <i>plus</i>   | -            |
