# Supplementary material for: Sequence of the Gonium pectorale Mating Locus Reveals a Complex and Dynamic History of Changes in Volvocine Algal Mating Haplotypes
Source: Oxford University Press journal article supplement (doi:10.1534/g3.115.026229), 2016-03-08
Supplement: 026229_tables3.pdf [file 026229_tables3.pdf]

**Table S3. Locations of *Volvox carteri* and**

***Chlamydomonas reinhardtii* MT R domain genes in *Gonium pectorale*. V. *carteri* gametologs (“query/gene name” and their positions) were used to identify their homologs in *C. reinhardtii* and *G. pectorale*, except for “522875” from *C. reinhardtii* rearranged domain.**

For *V. carteri*, MT and surrounding locations are designated as either linkage group (LG) I rearranged (R), telomere- (T) or centromere- (C) proximal. For *C. reinhardtii*, locations around MT are shown in chromosome (Chr.) 6 with C/R/T. *G. pectorale* location are not coordinated to chromosome or linkage groups and represented by scaffold names. Syntenic blocs in *G. pectorale* MT are designated by I, II, III, IV, or v as shown in Figure 2A. *G. pectorale* scaffold00010 is closely linked to MT. Genomic locations unlinked to MT loci are designated in respective scaffolds. n/d: not detected

| query/gene name | <i>Volvox carteri</i> | <i>Chlamydomonas reinhardtii</i> | <i>Gonium pectorale</i> |
|-----------------|-----------------------|----------------------------------|-------------------------|
| TOC34           | LG I R                | Chr. 6 (T)                       | MT (I)                  |
| MAT3            | LG I R                | Chr. 6 (C)                       | MT (II)                 |
| WDR57           | LG I R                | Chr. 6 (C)                       | MT (II)                 |
| LEU1S           | LG I R                | Chr. 6 (R)                       | MT (II)                 |
| ATPvC1          | LG I R                | Chr. 6 (T)                       | MT (II)                 |
| EIF5Bb          | LG I R                | Chr. 6 (T)                       | MT (II)                 |
| HSP70b          | LG I R                | Chr. 6 (T)                       | MT (II)                 |
| METM1           | LG I R                | Chr. 6 (T)                       | MT (II)                 |
| MME6            | LG I R                | Chr. 6 (T)                       | MT (II)                 |
| SPS1            | LG I R                | Chr. 6 (T)                       | MT (II)                 |
| DRG1            | LG I R                | Chr. 6 (R)                       | MT (v)                  |
| PTC1            | LG I R                | Chr. 6 (T)                       | MT (III)                |
| RPL37a          | LG I C                | Chr. 6 (C)                       | MT (IV)                 |
| ATPvL1          | LG I R                | Chr. 6 (C)                       | MT (IV)                 |
| FTT2            | LG I R                | Chr. 6 (C)                       | MT (IV)                 |
| MTF0716         | LG I R                | Chr. 6 (C)                       | MT (IV)                 |
| MTF1026         | LG I R                | Chr. 6 (C)                       | MT (IV)                 |
| PGM6            | LG I R                | Chr. 6 (C)                       | MT (IV)                 |
| SeiEF           | LG I R                | Chr. 6 (C)                       | MT (IV)                 |
| AMPKR1          | LG I R                | Chr. 6 (T)                       | MT (IV)                 |
| PLC             | LG I R                | Chr. 6 (C)                       | scaffold00010           |
| SpoVS           | LG I R                | Chr. 6 (C)                       | scaffold00010           |
| VPS53A          | LG I R                | Chr. 6 (C)                       | scaffold00010           |
| VPS53B          | LG I R                | Chr. 6 (C)                       | scaffold00010           |
| VPS53C          | LG I R                | Chr. 6 (C)                       | scaffold00010           |
| VPS53D          | LG I R                | Chr. 6 (C)                       | scaffold00010           |
| PAP1            | LG I T                | Chr. 6 (C)                       | scaffold00010           |
| AIP1            | LG I R                | Chr. 6 (C)                       | scaffold00001           |
| PRX1            | LG I R                | Chr. 6 (R)                       | scaffold00001           |
| UNC50           | LG I R                | Chr. 6 (T)                       | scaffold00002           |
| RGP1            | LG I R                | Chr. 6 (C)                       | scaffold00003           |
| MTF1320         | LG I R                | Chr. 6 (C)                       | scaffold00003           |
| MTF1109         | LG I R                | Chr. 6 (T)                       | scaffold00003           |
| MTF0870         | LG I R                | n/d                              | scaffold00004           |
| BBS2            | LG I C                | Chr. 6 (C)                       | scaffold00005           |
| ARP4            | LG I R                | Chr. 6 (T)                       | scaffold00005           |
| MTF1484         | LG I R                | Chr. 6 (T)                       | scaffold00005           |
| NMDA1           | LG I C                | Chr. 6 (R)                       | scaffold00006           |
| PR46a           | LG I C                | Chr. 6 (R)                       | scaffold00007           |
| PDK1            | scaffold_11           | Chr. 6 (R)                       | scaffold00007           |
| ALB3_1          | LG I R                | Chr. 6 (T)                       | scaffold00007           |
| MTF0992         | LG I R                | n/d                              | scaffold00007           |
| GCSH            | LG I C                | Chr. 6 (R)                       | scaffold00008           |
| CGL70           | scaffold_47           | Chr. 6 (R)                       | scaffold00009           |
| PR46b           | LG I C                | Chr. 6 (R)                       | scaffold00014           |
| UTP1            | LG I R                | Chr. 6 (R)                       | scaffold00015           |
| LPS1            | scaffold_20           | Chr. 6 (R)                       | scaffold00021           |
| MOT41           | LG I R                | Chr. 6 (T)                       | scaffold00022           |
| SPL2            | LG I R                | Chr. 6 (R)                       | scaffold00026           |
| MTF0674         | LG I R                | n/d                              | scaffold00027           |
| BFR1            | LG I R                | Chr. 6 (C)                       | scaffold00029           |
| THI10           | LG I R                | Chr. 6 (C)                       | scaffold00029           |
| MTF1436         | LG I R                | Chr. 6 (T)                       | scaffold00033           |
| FA1             | LG I R                | Chr. 6 (C)                       | scaffold00043           |
| PRP4            | LG I T                | Chr. 6 (T)                       | scaffold00045           |
| NMT1            | LG I R                | Chr. 6 (T)                       | scaffold00046           |
| DHC1b           | LG I R                | Chr. 6 (T)                       | scaffold00049           |
| L7Ae            | LG I R                | Chr. 6 (T)                       | scaffold00053           |
| CRB1            | LG I R                | Chr. 6 (T)                       | scaffold00055           |
| UBCH1           | LG I R                | Chr. 6 (R)                       | scaffold00064           |
| EFG8            | LG I R                | Chr. 6 (C)                       | scaffold00071           |
| MAPKK1          | LG I R                | Chr. 6 (T)                       | scaffold00090           |
| FAP75           | LG I T                | Chr. 6 (T)                       | scaffold00090           |
| CGL55           | LG I R                | Chr. 6 (T)                       | scaffold00091           |
| OTU2a           | scaffold_1            | Chr. 6 (R)                       | scaffold00113           |
| PIP5K1          | LG I T                | Chr. 6 (T)                       | scaffold00116           |
| MTF1458         | LG I R                | Chr. 6 (C)                       | scaffold00191           |
| SDA1            | LG I R                | Chr. 6 (C)                       | scaffold00324           |
| 522872          | scaffold_8            | Chr. 6 (R)                       | scaffold00373           |
| RPS3A2          | LG I T                | Chr. 13                          | scaffold00462           |
| PSF2            | LG I R                | Chr. 6 (T)                       | scaffold00652           |
| MADS2           | LG I C                | Chr. 6 (R)                       | scaffold00785           |
| DLA3            | n/d                   | Chr. 6 (R)                       | scaffold00802           |
| MTF1733         | LG I R                | Chr. 6 (T)                       | scaffold01026           |
| PKY1            | LG I C                | Chr. 6 (R)                       | scaffold01360           |
| HPRG1           | LG I R                | Chr. 6 (R)                       | scaffold01894           |
| UCP2            | LG I R                | Chr. 6 (C)                       | n/d                     |
| 522875          | n/d                   | Chr. 6 (R)                       | n/d                     |
| MTF0684         | LG I R                | Chr. 6 (T)                       | n/d                     |
| MTF0822         | LG I R                | Chr. 6 (T)                       | n/d                     |
| MT0044          | LG I T                | Chr. 6 (T)                       | n/d                     |
| MT0045          | LG I T                | Chr. 6 (T)                       | n/d                     |
| MT2177          | LG I C                | n/d                              | n/d                     |
| MT2215          | LG I C                | n/d                              | n/d                     |
| MTF0709         | LG I R                | n/d                              | n/d                     |
| MT0083          | LG I T                | n/d                              | n/d                     |
