# Supplementary material for: Sequence of the Gonium pectorale Mating Locus Reveals a Complex and Dynamic History of Changes in Volvocine Algal Mating Haplotypes
Source: Oxford University Press journal article supplement (doi:10.1534/g3.115.026229), 2016-03-08
Supplement: 026229_tables4.pdf [file 026229_tables4.pdf]

**Table S4. Non-synonymous (dN) and synonymous (dS) substitutions of gametologs in *Gonium pectorale*.**

| Name     | dN     | SE     | dS     | SE     |
|----------|--------|--------|--------|--------|
| AMPKR1   | 0.0004 | 0.0003 | 0.0008 | 0.0008 |
| ATPvC1   | 0      | 0      | 0.004  | 0.004  |
| ATPvL1   | 0      | 0      | 0.0068 | 0.0068 |
| DRG1     | 0      | 0      | 0.0048 | 0.0049 |
| EIF5Bb   | 0.0009 | 0.0009 | 0      | 0      |
| FTT2     | 0      | 0      | 0      | 0      |
| GMTp03   | 0.0012 | 0.0012 | 0      | 0      |
| GMTp14   | 0.0007 | 0.0005 | 0.0018 | 0.0018 |
| GMTp19   | 0      | 0      | 0      | 0      |
| HSP70B * | 0.0006 | 0.0006 | 0.0678 | 0.0151 |
| LEU1S    | 0      | 0      | 0.02   | 0.0116 |
| MAT3     | 0.0005 | 0.0005 | 0      | 0      |
| METM1    | 0      | 0      | 0.0109 | 0.0077 |
| MME6     | 0.0013 | 0.0009 | 0.0118 | 0.0059 |
| PGM6     | 0      | 0      | 0      | 0      |
| PTC1     | 0      | 0      | 0.0068 | 0.0034 |
| RPL37A   | 0      | 0      | 0      | 0      |
| SeIEF    | 0.0007 | 0.0007 | 0      | 0      |
| SPS1     | 0      | 0      | 0      | 0      |
| TOC34 *  | 0.0623 | 0.0097 | 0.5549 | 0.0785 |
| WDR57    | 0.0014 | 0.0014 | 0.0044 | 0.0044 |
